# Supplementary material for: High-speed laser writing of structural colors for full-color inkless printing
Source: PubMed Central journal article supplement (PMC9894925; doi:10.1038/s41467-023-36275-9), 2023-02-02
Supplement: 41467_2023_36275_MOESM3_ESM.pdf [file 41467_2023_36275_MOESM3_ESM.pdf]

## **Description of Additional Supplementary Files:**

**Supplementary Movie 1:** Video of laser printing process with a speed of 10 cm<sup>2</sup>/s.
